# Supplementary material
Source: PubMed Central journal article supplement (PMC4179448)

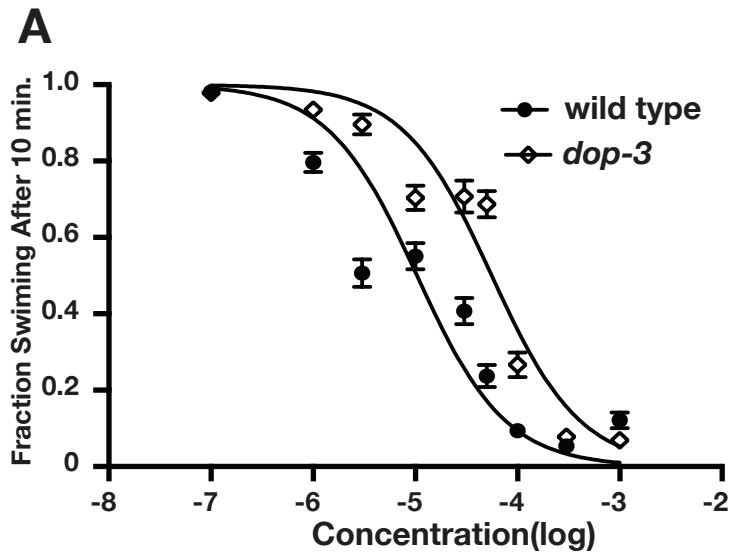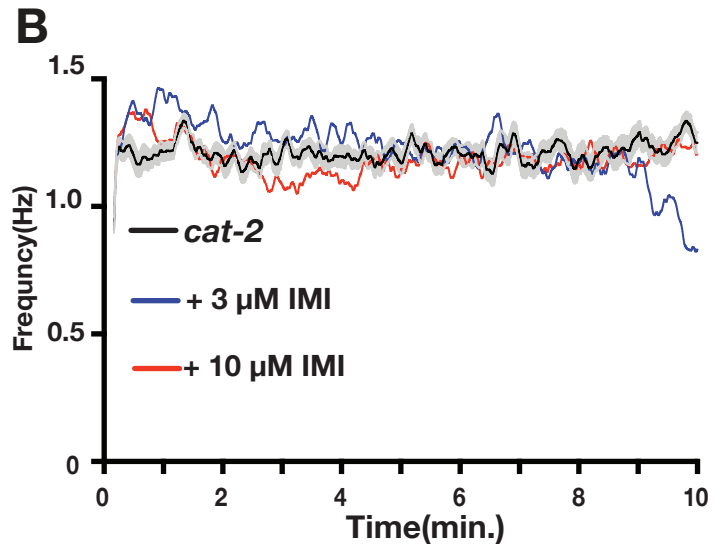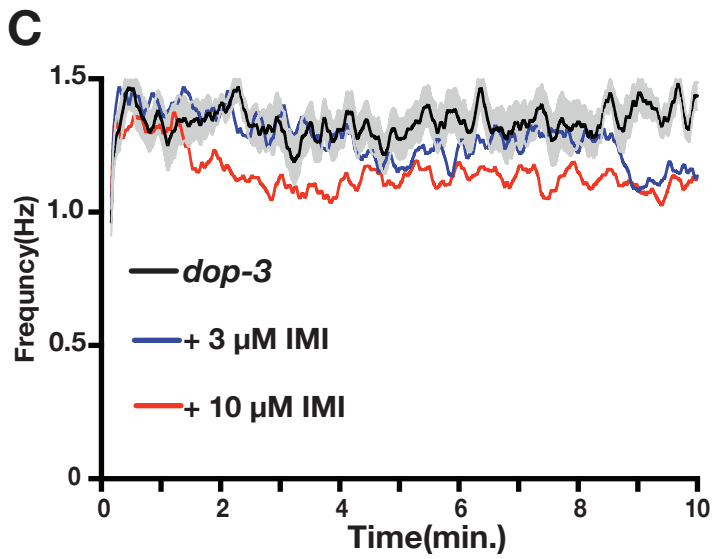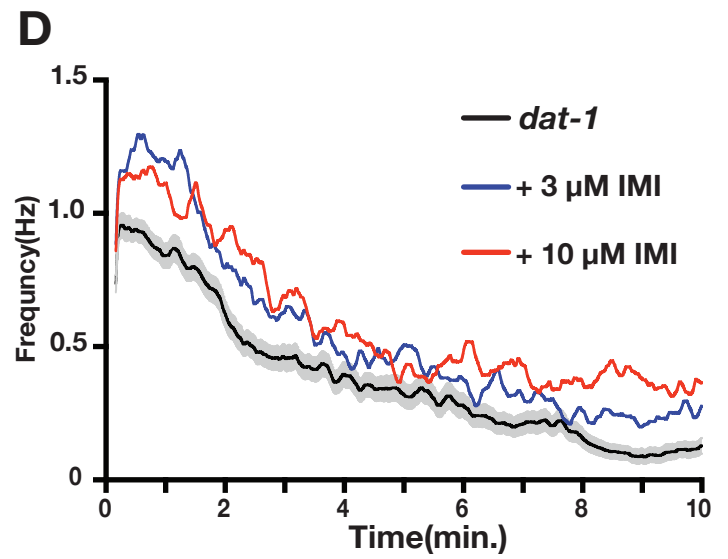

Supplement: NIHMS602556-supplement-01.pdf [file NIHMS602556-supplement-01.pdf]

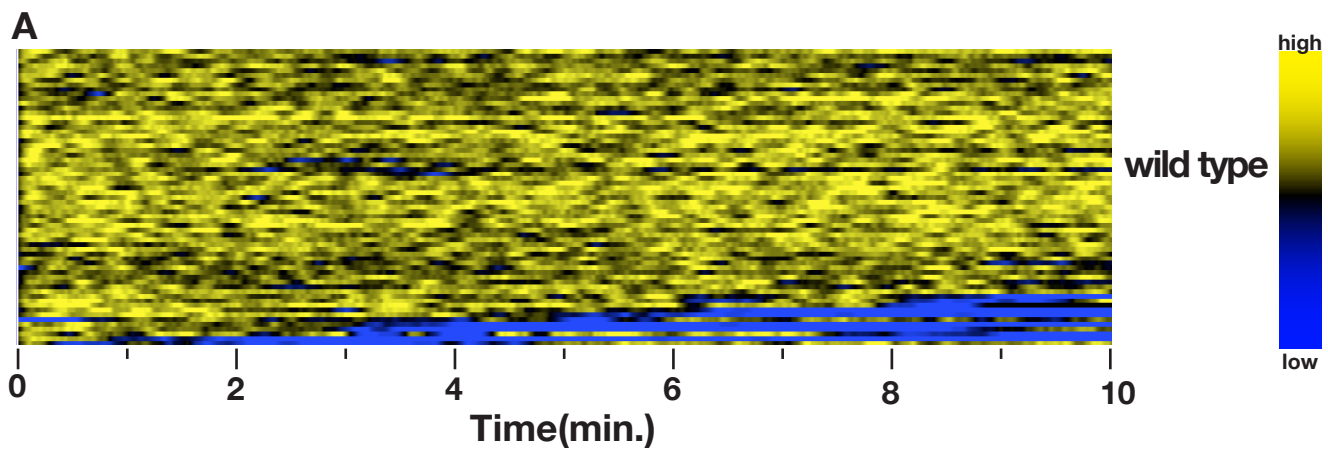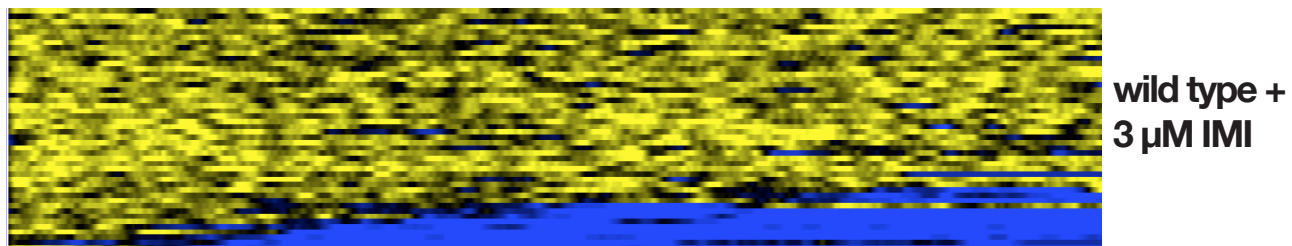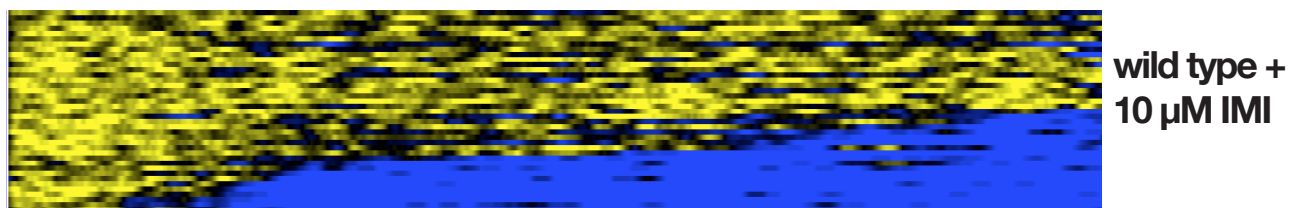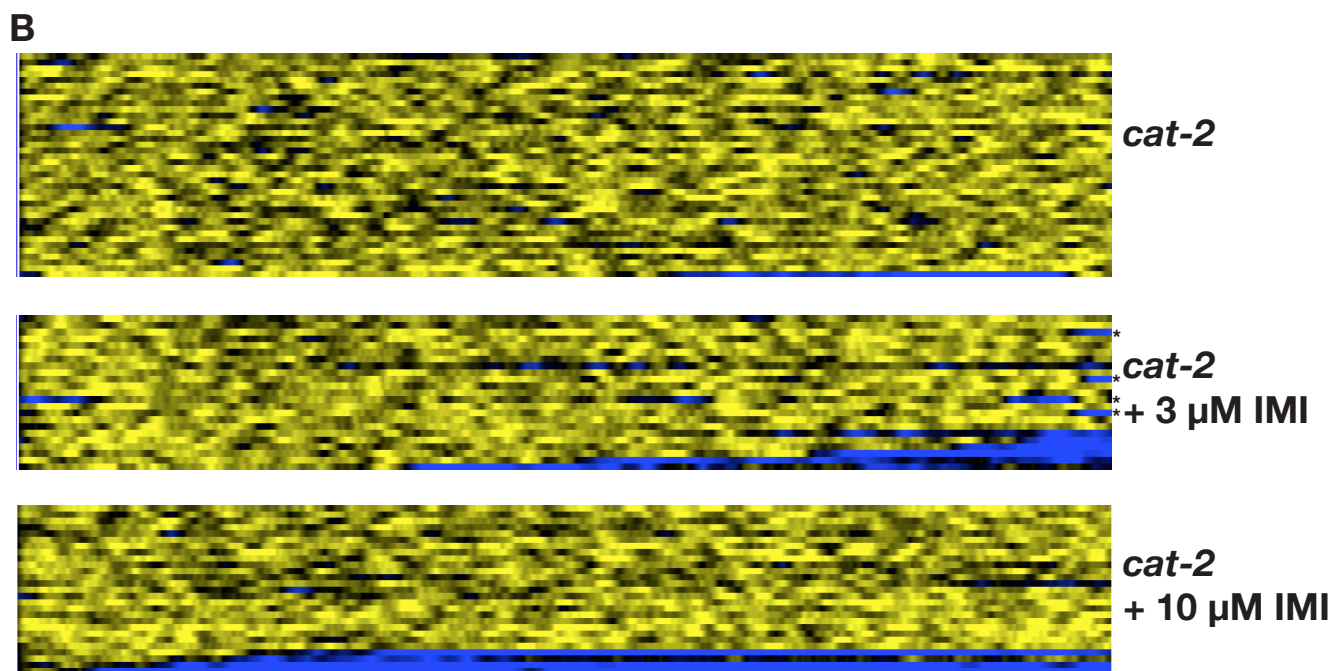

C

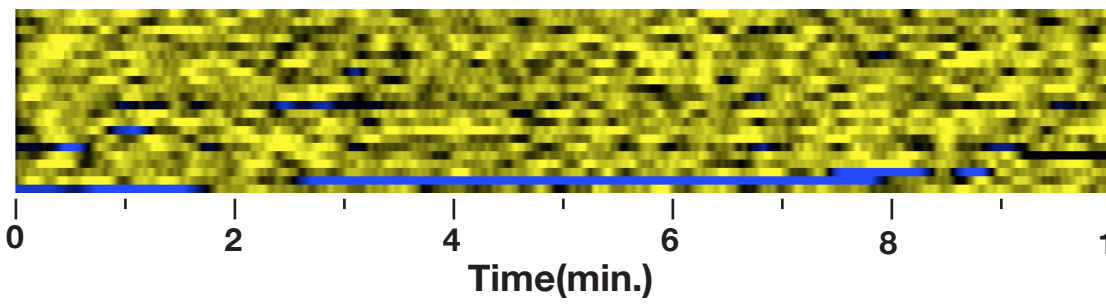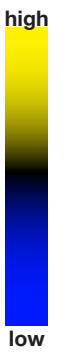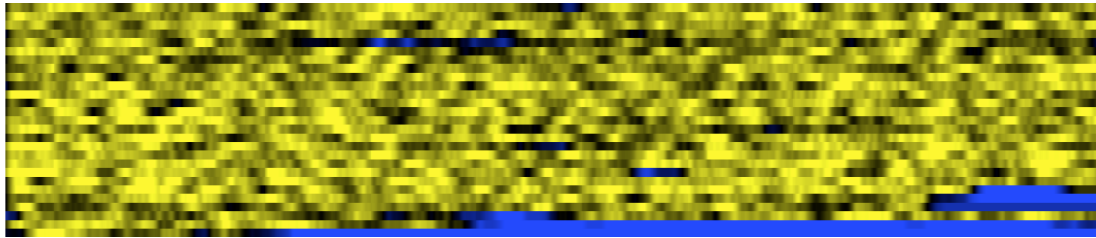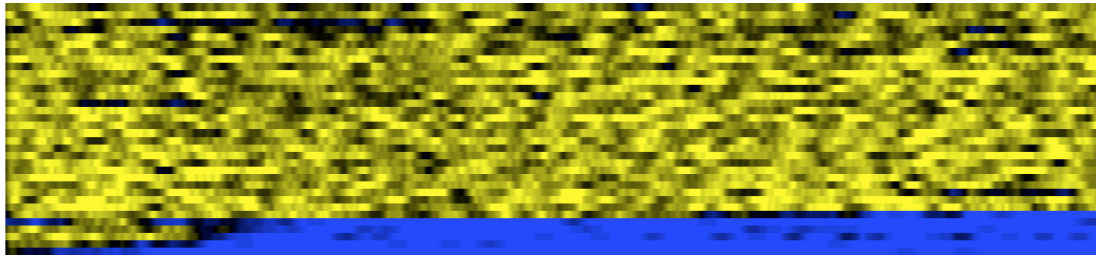

D

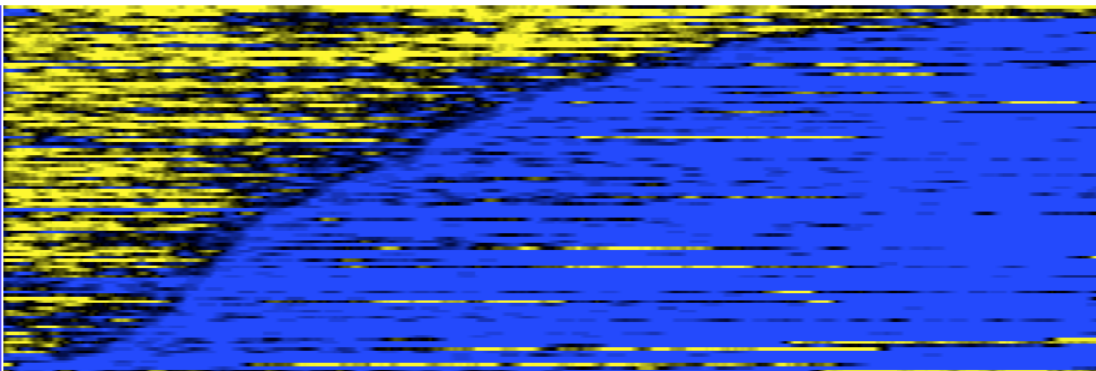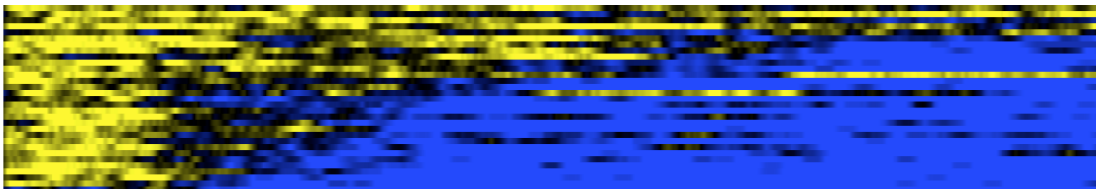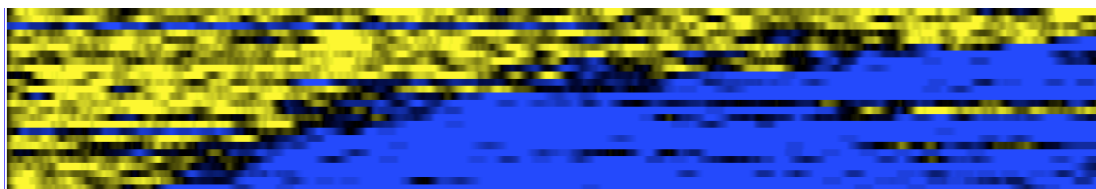

Supplement: NIHMS602556-supplement-02.pdf [file NIHMS602556-supplement-02.pdf]

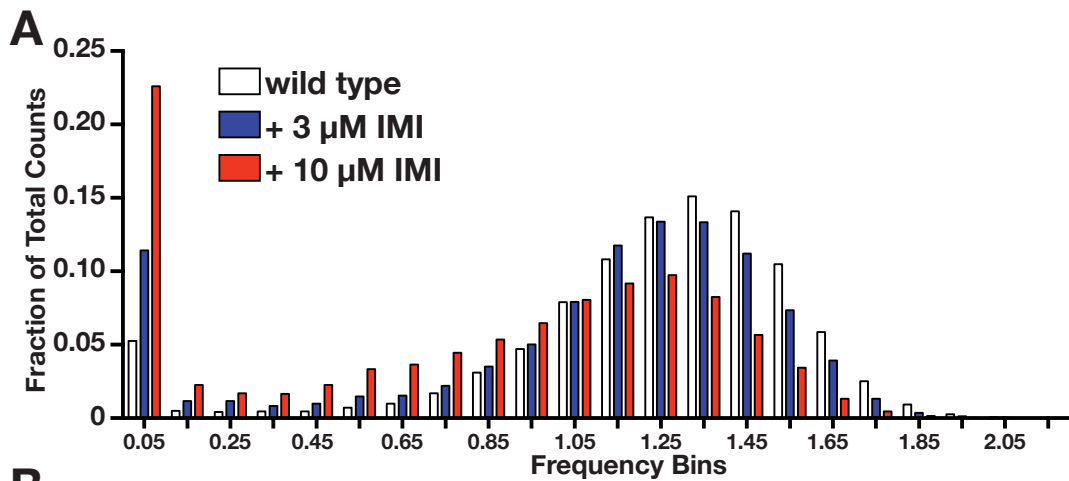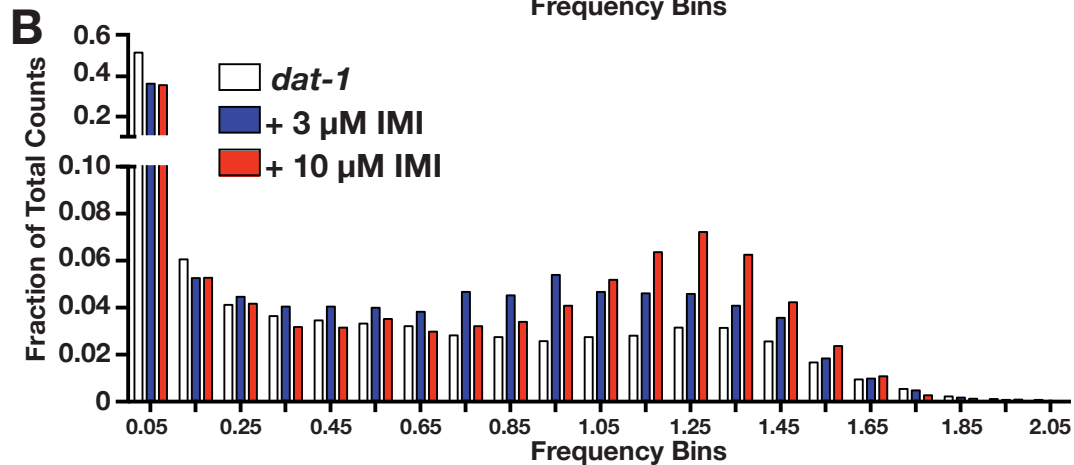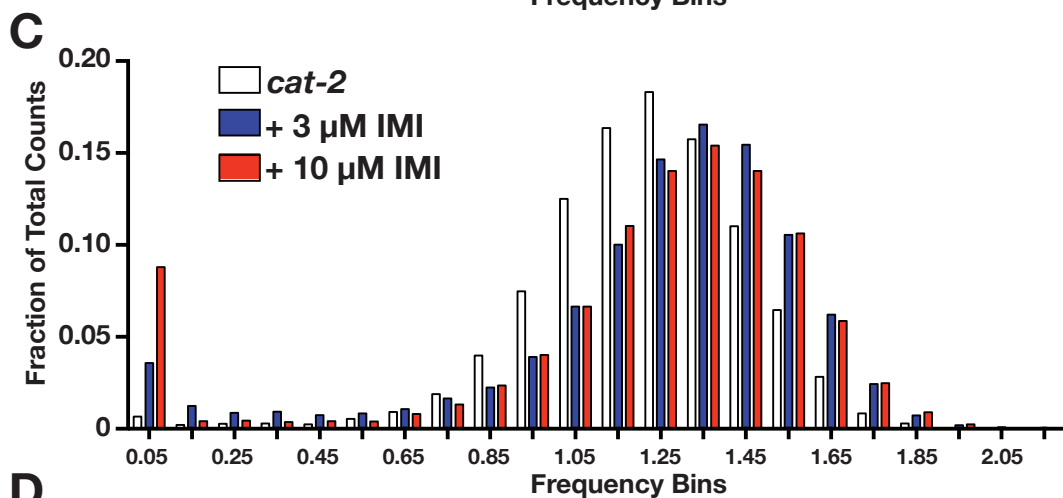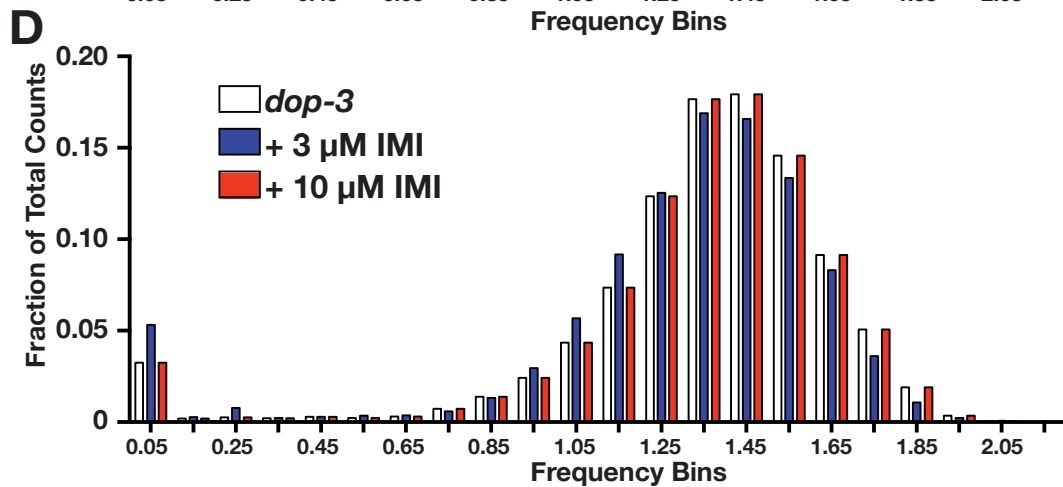

Supplement: NIHMS602556-supplement-03.pdf [file NIHMS602556-supplement-03.pdf]
